# Supplementary material
Source: Springer Nature journal article supplement (https://www.springermedizin.de/resource/supplementary/12888_2010_777_MOESM3_ESM.pdf/9478716)
Supplement: MOESM3 [file 9478716]

## Items dropped after Exploratory Factor Analysis

- Patients/residents employed within facility
- Patients/residents paid for any work they do in the facility
- Patients/residents usually have access to the staff office
- Staff only toilets/kitchen/room for breaks
- Unit carries out or arranges annual health check-ups for patients/residents
- Same activities are arranged for all patients/residents
- System for independent inspection of unit
- Researcher able to enter unit unannounced
